# Supplementary material
Source: publisher figshare collection journal article supplement (https://gsajournals.figshare.com/articles/dataset/_/14036507)
Supplement: Supplementary file 1 [file 1]

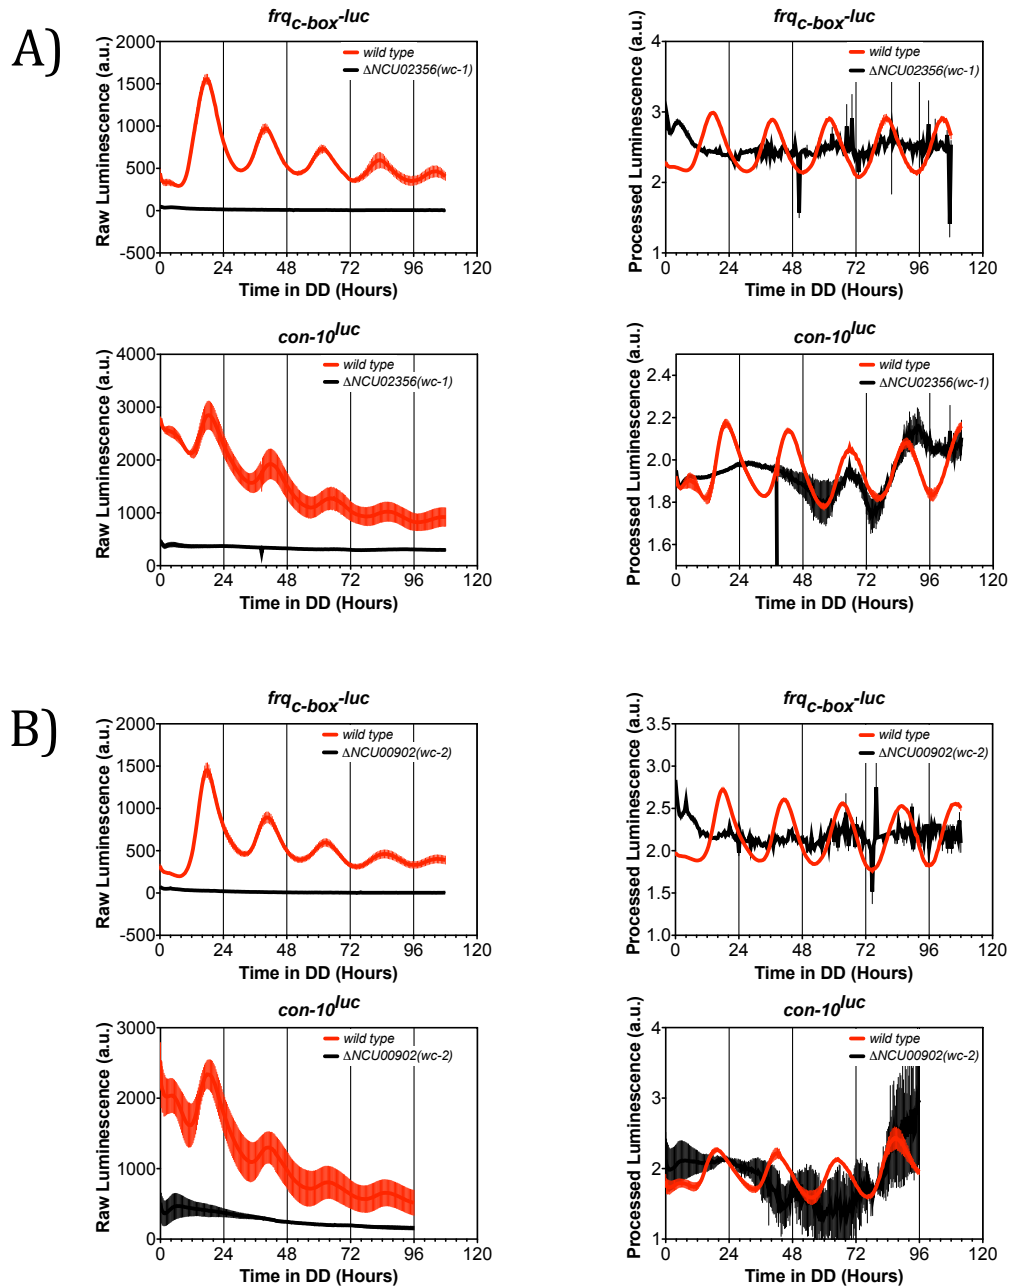

**Supplementary Figure 1. Luciferase circadian reporters are arrhythmic in the absence of *wc-1* or *wc-2*.** Both reporters, *frqC-box-luc* and *con-10<sup>luc</sup>*, confirm the absence of a functional clock in a  $\Delta wc-1$  (A) and  $\Delta wc-2$  (B) strain. The data is presented both as raw or processed luminescence.
