# Supplementary material
Source: publisher figshare collection journal article supplement (https://gsajournals.figshare.com/articles/dataset/_/14036507)
Supplement: Supplementary file 2 [file 1]

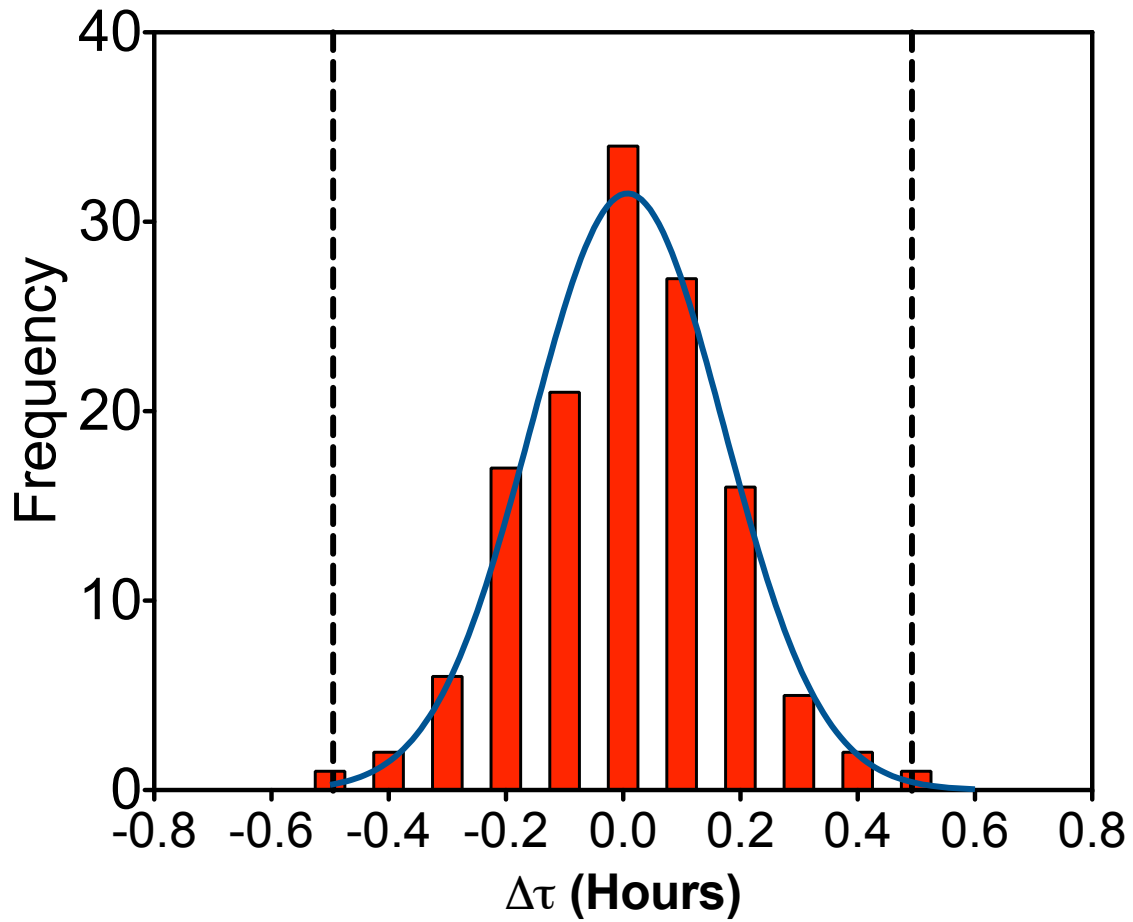

**Supplementary Figure 3. Period change distribution of wild type strains.** Histogram for  $\Delta\tau$  values for 132 sets of wild type strain/siblings used in each plate and experiment. The wild type population is normally distributed (blue line) using the Shapiro-Wilk normality test ( $p > 0.05$ ). The dashed lines (---) are the plus 3 and minus 3 standard deviation ( $\pm 3\delta$ ) from the mean.
