# Supplementary material
Source: publisher figshare collection journal article supplement (https://gsajournals.figshare.com/articles/dataset/_/14036507)
Supplement: Supplementary file 3 [file 1]

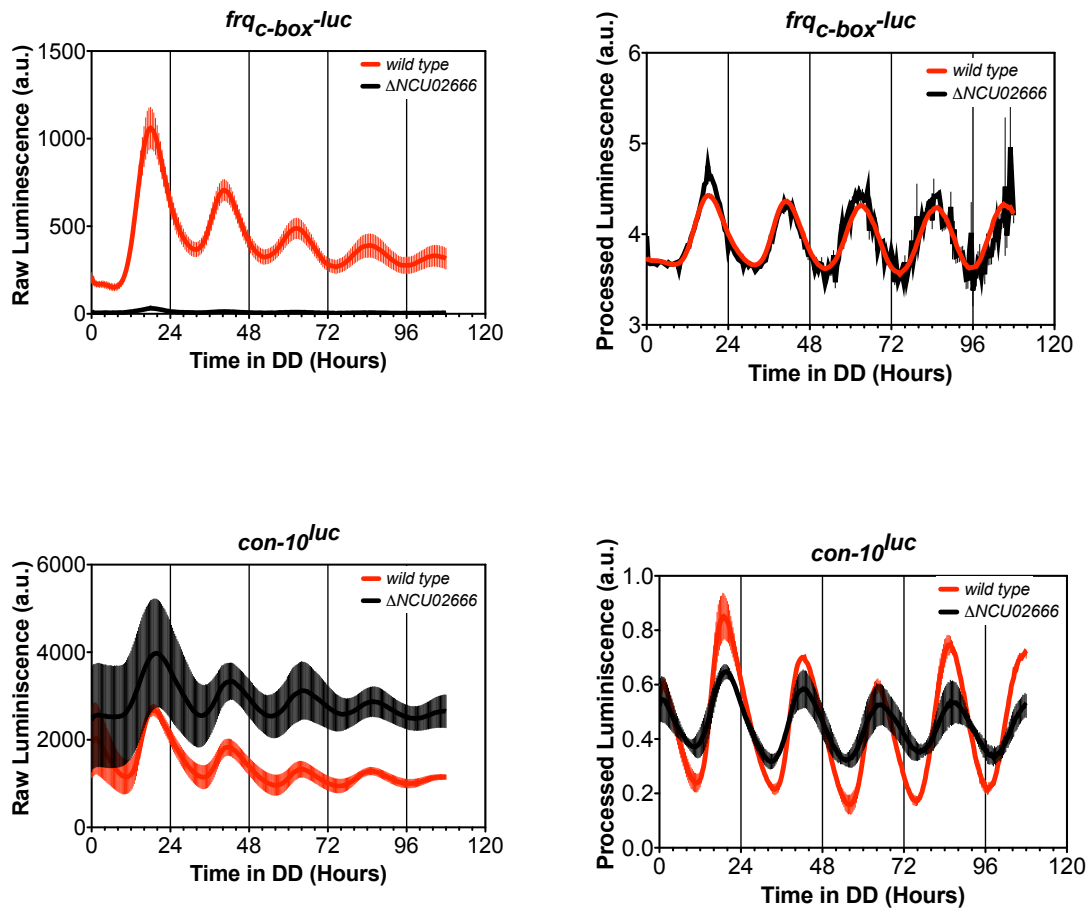

**Supplementary Figure 2. Clock reporters in a  $\Delta$ NCU02666 strain.** The *frq<sub>C</sub>-box-luc* reporter in  $\Delta$ NCU02666 exhibited extremely low levels of LUC activity (upper right panel). When such traces are normalized it is possible to confirm the presence of rhythmic traces particularly during the first two days, as these oscillations become noisy afterwards, contributing to a high RAE index for this strain. When the *con-10<sup>luc</sup>* reporter is analyzed in the absence of *NCU02666* it is possible to observe robust circadian rhythms in this strain.
